# Supplementary material for: The Impact of SsPI-1 Deletion on Streptococcus suis Virulence
Source: MDPI journal article supplement (doi:10.3390/pathogens8040287), 2019-12-06
Supplement: s1 [file s1]

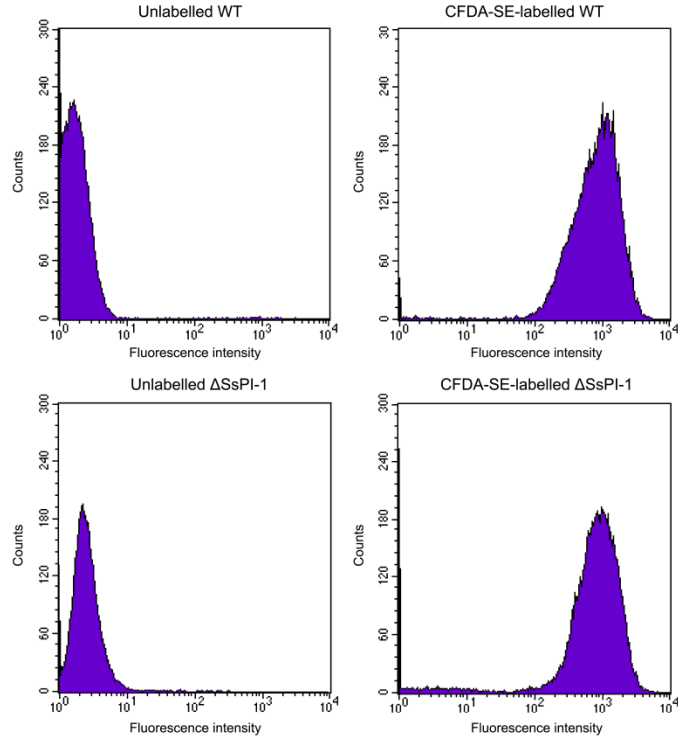

Supplementary Figure S1. Labelling of *S. suis* cells with CFDA-SE. Mid-logarithmic-phase bacteria were washed and labelled with CFDA-SE for 20 min at 37° C, then subjected to flow cytometer analysis. The labelling of the bacteria is seen as a shift in fluorescence intensity of the bacteria.
